# Supplementary material for: Subjective Generic Health Literacy and Its Associated Factors among Adolescents: Results of a Population-Based Online Survey in Germany
Source: MDPI journal article supplement (doi:10.3390/ijerph17228682), 2020-11-23
Supplement: s1 [file s1]

**Table S1** Odds ratios between socio-demographic, social and personal factors and poor health literacy levels among adolescents aged 14-17 ( $n = 1202$ ) based on GeKoJu 2019 data: models with and without interactions between age and sex.

| <i>Outcome category</i>        | <b>Scale A</b>                    |                                | <b>Scale B</b>                    |                                | <b>Scale C</b>                        |                                | <b>Scale D</b>                    |                                |
|--------------------------------|-----------------------------------|--------------------------------|-----------------------------------|--------------------------------|---------------------------------------|--------------------------------|-----------------------------------|--------------------------------|
|                                | <i>model without interactions</i> | <i>model with interactions</i> | <i>model without interactions</i> | <i>model with interactions</i> | <i>model without interactions</i>     | <i>model with interactions</i> | <i>model without interactions</i> | <i>model with interactions</i> |
|                                | Many/Some                         |                                | Low                               |                                | Passive/ Partly passive-partly active |                                | Low/moderate                      |                                |
|                                | OR<br>(95% CI)                    | OR<br>(95% CI)                 | OR<br>(95% CI)                    | OR<br>(95% CI)                 | OR<br>(95% CI)                        | OR<br>(95% CI)                 | OR<br>(95% CI)                    | OR<br>(95% CI)                 |
| <i>Socio-demographic</i>       |                                   |                                |                                   |                                |                                       |                                |                                   |                                |
| <b>Age</b>                     |                                   |                                |                                   |                                |                                       |                                |                                   |                                |
| 14 years                       | Ref.                              | Ref.                           | Ref.                              | Ref.                           | Ref.                                  | Ref.                           | Ref.                              | Ref.                           |
| 15 years                       | 1.16<br>(0.85-1.59)               | 1.3<br>(0.79-2.12)             | 0.65<br>(0.39-1.06)               | 0.78<br>(0.39-1.56)            | 1.22<br>(0.80-1.85)                   | 1.35<br>(0.65-2.79)            | 0.99<br>(0.65-1.50)               | 1.13<br>(0.58-2.21)            |
| 16 years                       | 1.13<br>(0.81-1.55)               | 0.95<br>(0.52-1.75)            | 0.97<br>(0.56-1.69)               | 1.19<br>(0.54-2.58)            | 1.4<br>(0.93-2.12)                    | 1.46<br>(0.80-2.68)            | 0.77<br>(0.50-1.18)               | 0.71<br>(0.38-1.31)            |
| 17 years                       | 1.27<br>(0.91-1.79)               | 1.48<br>(0.89-2.45)            | 0.7<br>(0.40-1.20)                | 0.97<br>(0.49-1.93)            | 0.94<br>(0.65-1.37)                   | 1.47<br>(0.81-2.67)            | 0.66<br>(0.39-1.13)               | 0.61<br>(0.29-1.29)            |
| <b>Sex</b>                     |                                   |                                |                                   |                                |                                       |                                |                                   |                                |
| Male                           | Ref.                              | Ref.                           | Ref.                              | Ref.                           | Ref.                                  | Ref.                           | Ref.                              | Ref.                           |
| Female                         | 1.56**<br>(1.14-2.13)             | 1.63<br>(0.99-2.67)            | 0.63*<br>(0.44-0.91)              | 0.91<br>(0.47-1.76)            | 0.65*<br>(0.45-0.93)                  | 0.86<br>(0.49-1.53)            | 0.98<br>(0.71-1.35)               | 0.94<br>(0.57-1.55)            |
| <b>Education</b>               |                                   |                                |                                   |                                |                                       |                                |                                   |                                |
| School visit/Grammar school    | Ref.                              | Ref.                           | Ref.                              | Ref.                           | Ref.                                  | Ref.                           | Ref.                              | Ref.                           |
| School visit/No Grammar school | 0.98<br>(0.75-1.27)               | 0.98<br>(0.75-1.28)            | 1.1<br>(0.77-1.58)                | 1.1<br>(0.76-1.58)             | 1.19<br>(0.88-1.60)                   | 1.2<br>(0.89-1.63)             | 1.85***<br>(1.32-2.60)            | 1.85***<br>(1.31-2.61)         |
| No school visit                | 2.08**<br>(1.25-3.46)             | 2.08**<br>(1.27-3.42)          | 0.75<br>(0.45-1.25)               | 0.75<br>(0.45-1.24)            | 1.67*<br>(1.04-2.69)                  | 1.65*<br>(1.05-2.60)           | 1.62<br>(0.90-2.93)               | 1.64<br>(0.91-2.95)            |

|                                   |             |             |             |             |             |             |             |             |      |
|-----------------------------------|-------------|-------------|-------------|-------------|-------------|-------------|-------------|-------------|------|
| <b>Family Affluence</b>           |             |             |             |             |             |             |             |             |      |
| High                              | Ref.        | Ref.        | Ref.        | Ref.        | Ref.        | Ref.        | Ref.        | Ref.        | Ref. |
| Low                               | 1.83*       | 1.78*       | 1.65        | 1.63        | 1.80*       | 1.77*       | 1.32        | 1.3         |      |
|                                   | (1.04-3.21) | (1.02-3.12) | (0.96-2.82) | (0.95-2.77) | (1.06-3.06) | (1.03-3.03) | (0.82-2.11) | (0.81-2.10) |      |
| Middle                            | 1.51        | 1.46        | 1.55*       | 1.54        | 1.51**      | 1.47*       | 1.37*       | 1.36*       |      |
|                                   | (0.99-2.29) | (0.96-2.23) | (1.01-2.40) | (1.00-2.38) | (1.12-2.03) | (1.08-2.01) | (1.04-1.80) | (1.02-1.82) |      |
| <b>Migration background</b>       |             |             |             |             |             |             |             |             |      |
| No                                | Ref.        | Ref.        | Ref.        | Ref.        | Ref.        | Ref.        | Ref.        | Ref.        | Ref. |
| One-sided                         | 0.67*       | 0.67*       | 0.64        | 0.65        | 1.3         | 1.32        | 1.11        | 1.11        |      |
|                                   | (0.46-0.98) | (0.45-0.98) | (0.37-1.10) | (0.37-1.11) | (0.88-1.93) | (0.89-1.95) | (0.73-1.68) | (0.73-1.69) |      |
| Two-sided                         | 1.63        | 1.62        | 0.84        | 0.85        | 1.32        | 1.35        | 1.3         | 1.29        |      |
|                                   | (1.00-2.66) | (0.99-2.66) | (0.51-1.37) | (0.53-1.39) | (0.69-2.54) | (0.71-2.56) | (0.88-1.92) | (0.87-1.90) |      |
| <i>Social</i>                     |             |             |             |             |             |             |             |             |      |
| <b>Social support by family</b>   |             |             |             |             |             |             |             |             |      |
| High                              | Ref.        | Ref.        | Ref.        | Ref.        | Ref.        | Ref.        | Ref.        | Ref.        | Ref. |
| low/moderate                      | 1.08        | 1.07        | 2.33***     | 2.31***     | 1.55*       | 1.54*       | 1.11        | 1.1         |      |
|                                   | (0.78-1.50) | (0.78-1.48) | (1.66-3.28) | (1.64-3.24) | (1.11-2.18) | (1.09-2.17) | (0.73-1.69) | (0.72-1.69) |      |
| <b>Social support by friends</b>  |             |             |             |             |             |             |             |             |      |
| High                              | Ref.        | Ref.        | Ref.        | Ref.        | Ref.        | Ref.        | Ref.        | Ref.        | Ref. |
| low/moderate                      | 1.58**      | 1.61**      | 1.98***     | 1.99***     | 1.71*       | 1.73**      | 1.54        | 1.54        |      |
|                                   | (1.18-2.11) | (1.20-2.14) | (1.43-2.74) | (1.43-2.75) | (1.14-2.57) | (1.15-2.59) | (0.97-2.43) | (0.98-2.43) |      |
| <i>Personal</i>                   |             |             |             |             |             |             |             |             |      |
| <b>Self-efficacy</b>              |             |             |             |             |             |             |             |             |      |
|                                   | 0.95***     | 0.95***     | 0.97***     | 0.97***     | 0.96***     | 0.96***     | 0.99**      | 0.99**      |      |
|                                   | (0.94-0.96) | (0.94-0.96) | (0.95-0.98) | (0.95-0.98) | (0.94-0.97) | (0.94-0.97) | (0.98-1.00) | (0.98-1.00) |      |
| <b>Interactions age &amp; sex</b> |             |             |             |             |             |             |             |             |      |
| 14 years*male                     |             | Ref.        |             | Ref.        |             | Ref.        |             | Ref.        |      |
| 15 years*female                   |             | 0.81        |             | 0.69        |             | 0.82        |             | 0.77        |      |
|                                   |             | (0.44-1.50) |             | (0.29-1.62) |             | (0.31-2.13) |             | (0.34-1.75) |      |
| 16 years *female                  |             | 1.43        |             | 0.67        |             | 0.93        |             | 1.18        |      |
|                                   |             | (0.67-3.04) |             | (0.26-1.74) |             | (0.42-2.09) |             | (0.57-2.42) |      |
| 17 years *female                  |             | 0.74        |             | 0.48        |             | 0.42        |             | 1.21        |      |

|                                                | (0.38-1.43)                       | (0.18-1.31)                       | (0.18-1.02)                       | (0.55-2.67)                       |
|------------------------------------------------|-----------------------------------|-----------------------------------|-----------------------------------|-----------------------------------|
| Adjusted Wald test statistic,<br>exact p-value | F(3.47) = 0.84<br><i>p</i> = 0.48 | F(3.47) = 0.70<br><i>p</i> = 0.56 | F(3.47) = 1.55<br><i>p</i> = 0.21 | F(3.47) = 0.43<br><i>p</i> = 0.73 |

\* *p* < 0.05; \*\* *p* < 0.01; \*\*\* *p* < 0.001

Abbreviations: CI = confidence interval; OR = odds ratio; Ref. = reference category.
